# Supplementary material for: Rituximab versus an alternative TNF inhibitor in patients with rheumatoid arthritis who failed to respond to a single previous TNF inhibitor: SWITCH-RA, a global, observational, comparative effectiveness study
Source: HighWire-hosted journal article supplement (doi:10.1136/annrheumdis-2013-203993), 2014-01-17
Supplement: annrheumdis-2013-203993supp.pdf [file annrheumdis-2013-203993supp.pdf]

### **Supplemental Text**

As with any observational study, there is always a concern of differences in baseline characteristics that are associated with disease activity, which may substantially influence response to therapy. Given the observational nature of this study, there is a possibility of selection bias resulting due to non-random assignment of treatment. The following baseline variables were available for analysis:

- Patient age
- Gender
- Country
- Years of initial RA diagnosis
- RF status
- Presence of anti-CCP
- Evidence of structural joint damage
- Number of surgical procedures related to RA
- Extra-articular manifestation of RA
- Number of comorbid conditions at baseline
- Type of first TNF inhibitor (antibody/receptor)
- Number of ongoing medications at baseline
- Factors related to selection of the particular second biologic
- Reason for discontinuation of first TNF inhibitor treatment (reason for change)
- Baseline outcome variables (e.g., HAQ score, physician's global assessment of disease activity, DAS28 score, etc.)
- Concurrent NSAID user anytime during the first 6 months of the study
- Concurrent corticosteroid user anytime during the first 6 months of the study
- Concurrent disease-modifying anti-rheumatic drugs (DMARD) use anytime during the first 6 months of the study

Factors clearly associated with selecting rituximab or an alternative TNF inhibitor (identified by a stepwise variable selection and multivariate logistic regression model) are illustrated in Figure S2.

**Figure S1** Factors associated with selection of rituximab versus an alternative TNF inhibitor

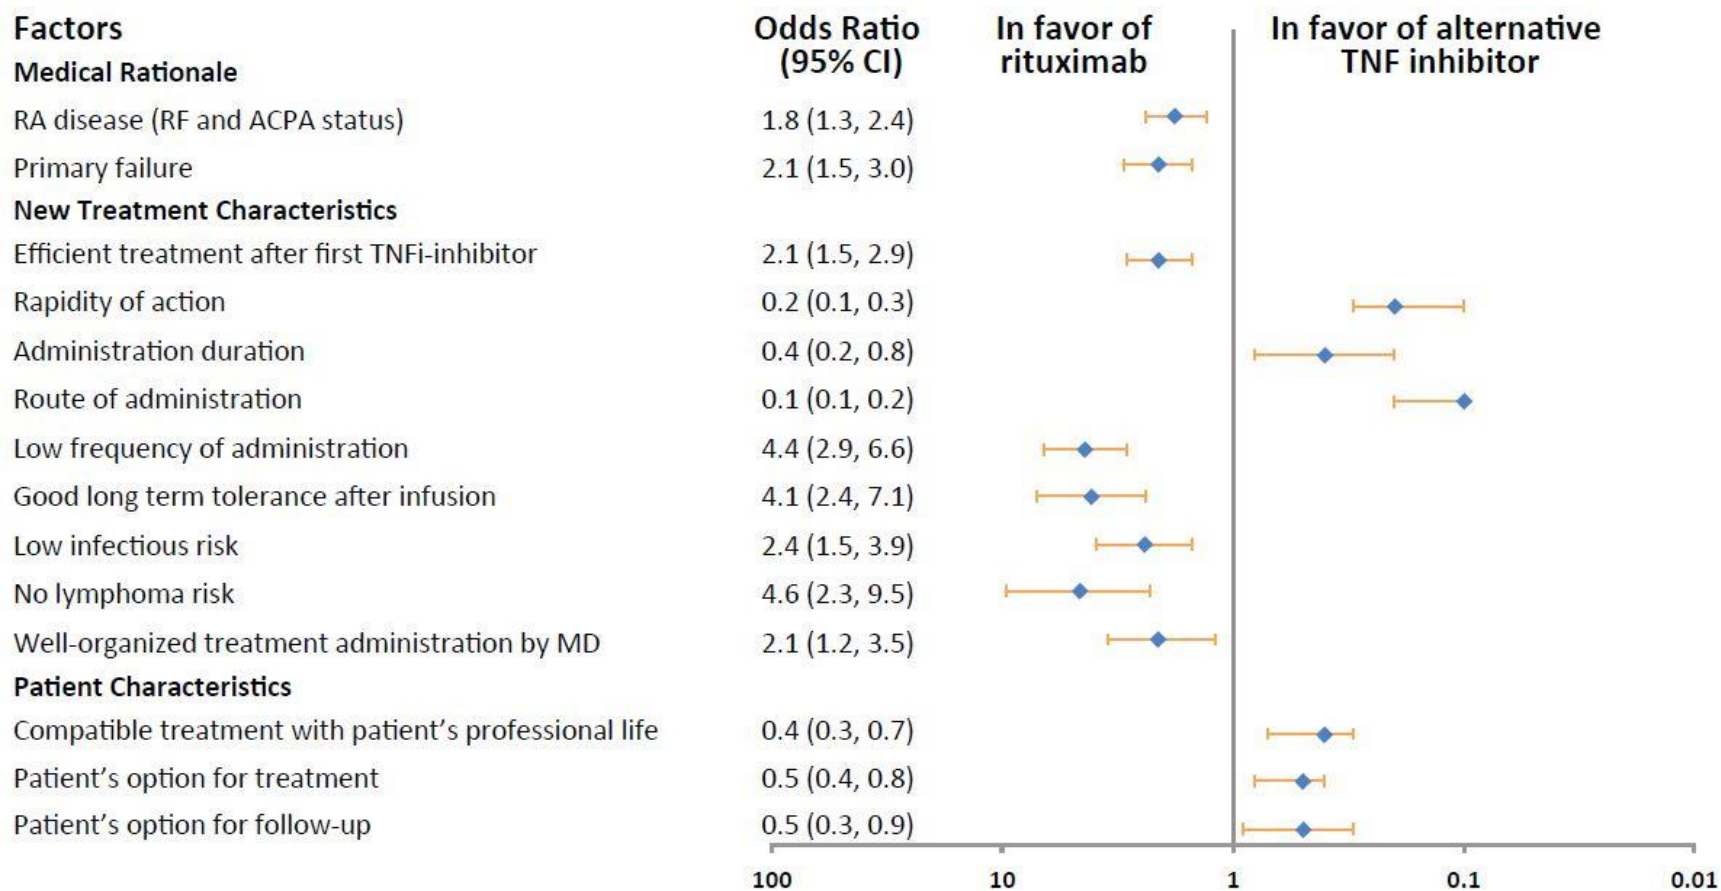

**Figure S2** Patient disposition

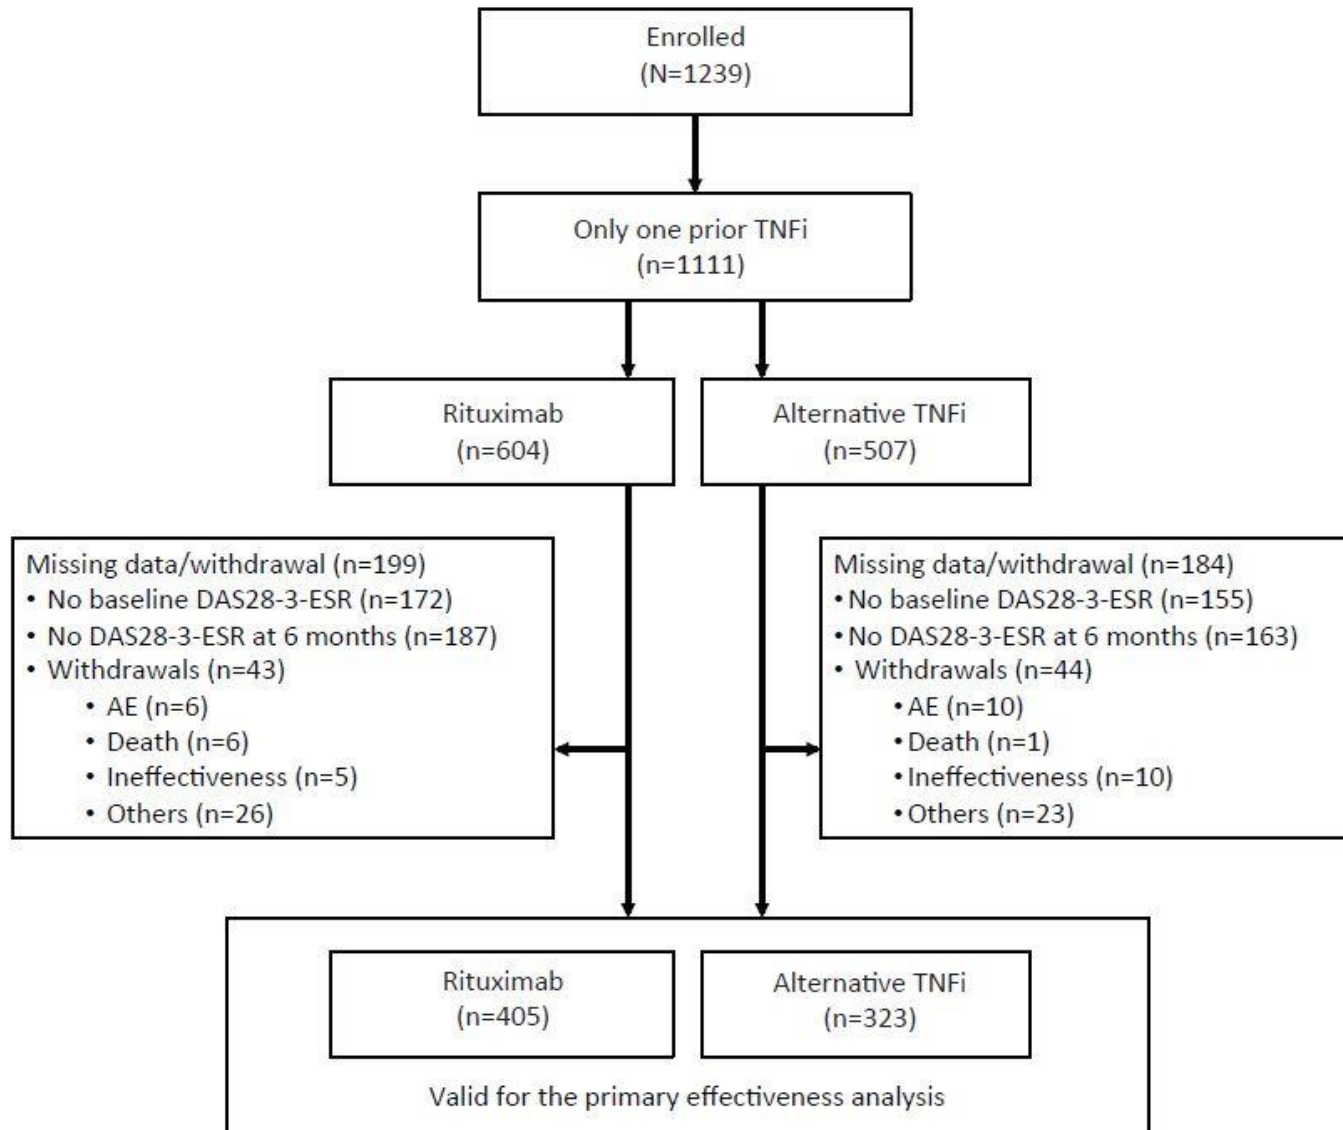

**Table S1** Type of the first (failed) and the second (alternative) TNF inhibitors

| n (%)                                  | Rituximab                     | Alternative TNF Inhibitor     |                               |
|----------------------------------------|-------------------------------|-------------------------------|-------------------------------|
| Full Analysis Population               | (n=604)                       | (n=507)                       |                               |
|                                        | 1 <sup>st</sup> TNF Inhibitor | 1 <sup>st</sup> TNF Inhibitor | 2 <sup>nd</sup> TNF Inhibitor |
| Adalimumab                             | 205 (33.9)                    | 182 (35.9)                    | 224 (44.2)                    |
| Etanercept                             | 257 (42.5)                    | 255 (50.3)                    | 190 (37.5)                    |
| Infliximab                             | 136 (22.5)                    | 66 (13.0)                     | 36 (7.1)                      |
| Other (Certolizumab, Golimummab, etc.) | 6 (1.0)                       | 4 (0.8)                       | 57 (11.2)                     |
|                                        |                               |                               |                               |
| Primary Effectiveness Population       | (n=405)                       | (n=323)                       |                               |
| Adalimumab                             | 131 (32.3)                    | 116 (35.9)                    | 151 (46.7)                    |
| Etanercept                             | 176 (43.5)                    | 162 (50.2)                    | 117 (36.2)                    |
| Infliximab                             | 95 (23.5)                     | 42 (13.0)                     | 23 (7.1)                      |
| Other (Certolizumab, Golimummab, etc.) | 3 (0.7)                       | 3 (0.9)                       | 32 (9.9)                      |
